# Supplementary material for: Enhanced thermoelectric properties of polyaniline/polypyrrole/carbon nanotube ternary composites by treatment with a secondary dopant using ferric chloride
Source: Royal Society of Chemistry journal article supplement (doi:10.1039/c9tc06300e), 2019-11-29
Supplement: c9tc06300e1.pdf [file c9tc06300e1.pdf]

## Supporting Information

### **Enhanced thermoelectric properties of polyaniline/polypyrrole/carbon nanotube ternary composites by treatment with a secondary dopant using ferric chloride**

Shichao Wang<sup>a,b,c</sup>, Yan Zhou <sup>a,b,c</sup>, Yijia Liu<sup>a,b</sup>, Lei Wang<sup>b,c</sup>, Chunmei Gao<sup>a\*</sup>,

---

<sup>a</sup> College of Chemistry and Environmental Engineering, Shenzhen University, Shenzhen 518060, China. Email: [gaocm@szu.edu.cn](mailto:gaocm@szu.edu.cn).

<sup>b</sup> Key Laboratory of Optoelectronic Devices and Systems of Ministry of Education and Guangdong Province, College of Optoelectronic Engineering, Shenzhen University, Shenzhen 518060, China.

<sup>c</sup> Shenzhen Key Laboratory of Polymer Science and Technology, College of Materials Science and Engineering, Shenzhen University, Shenzhen 518060, China.

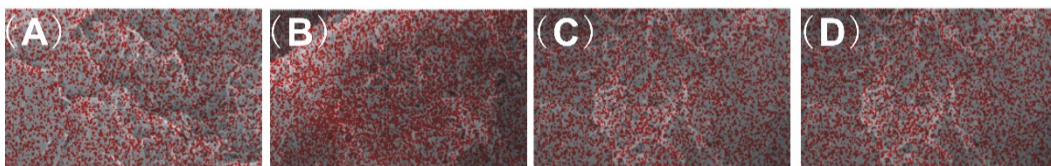

Figure S1 The EDX graphs of the dispersion of Fe element in the composite after  $\text{FeCl}_3$  doping:

An3Py0CT3 (A), An2Py1CT3 (B), An1.5Py1.5CT3 (C), and An1Py2CT3 (D).

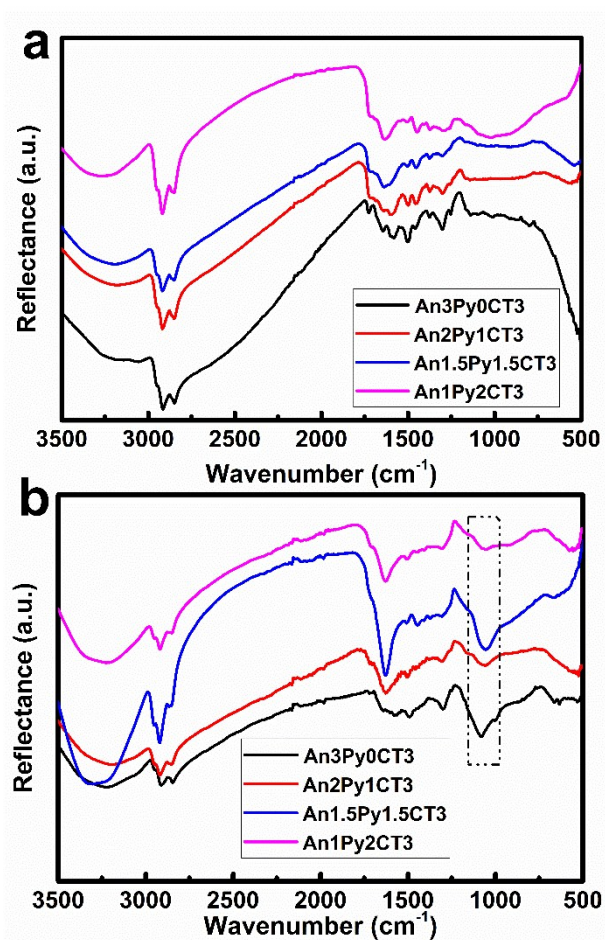

Figure S2 The original FTIR spectra of PANi/PPy/SWCNT ternary composites: before

$\text{FeCl}_3$  doping and after doped by 0.1 M  $\text{FeCl}_3$  solution in acetonitrile.

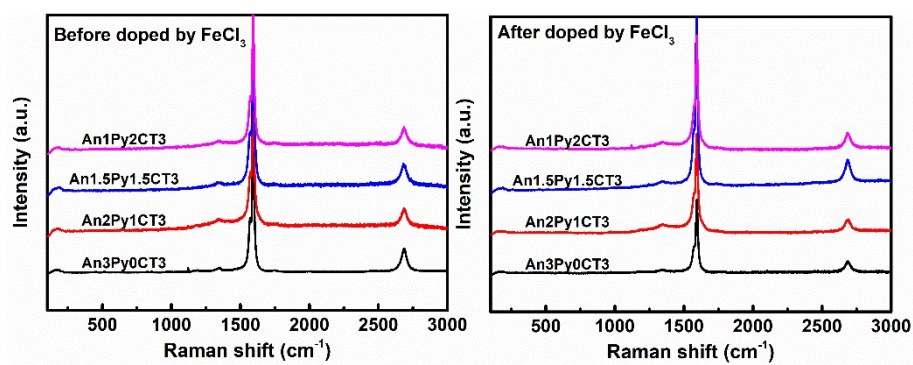

Figure S3 Raman spectra of PANi/PPy/SWCNT ternary composites: before FeCl<sub>3</sub> doping (a) and after doping with a 0.1 M FeCl<sub>3</sub> solution (b).
